# Supplementary material
Source: PubMed Central journal article supplement (PMC6794701)

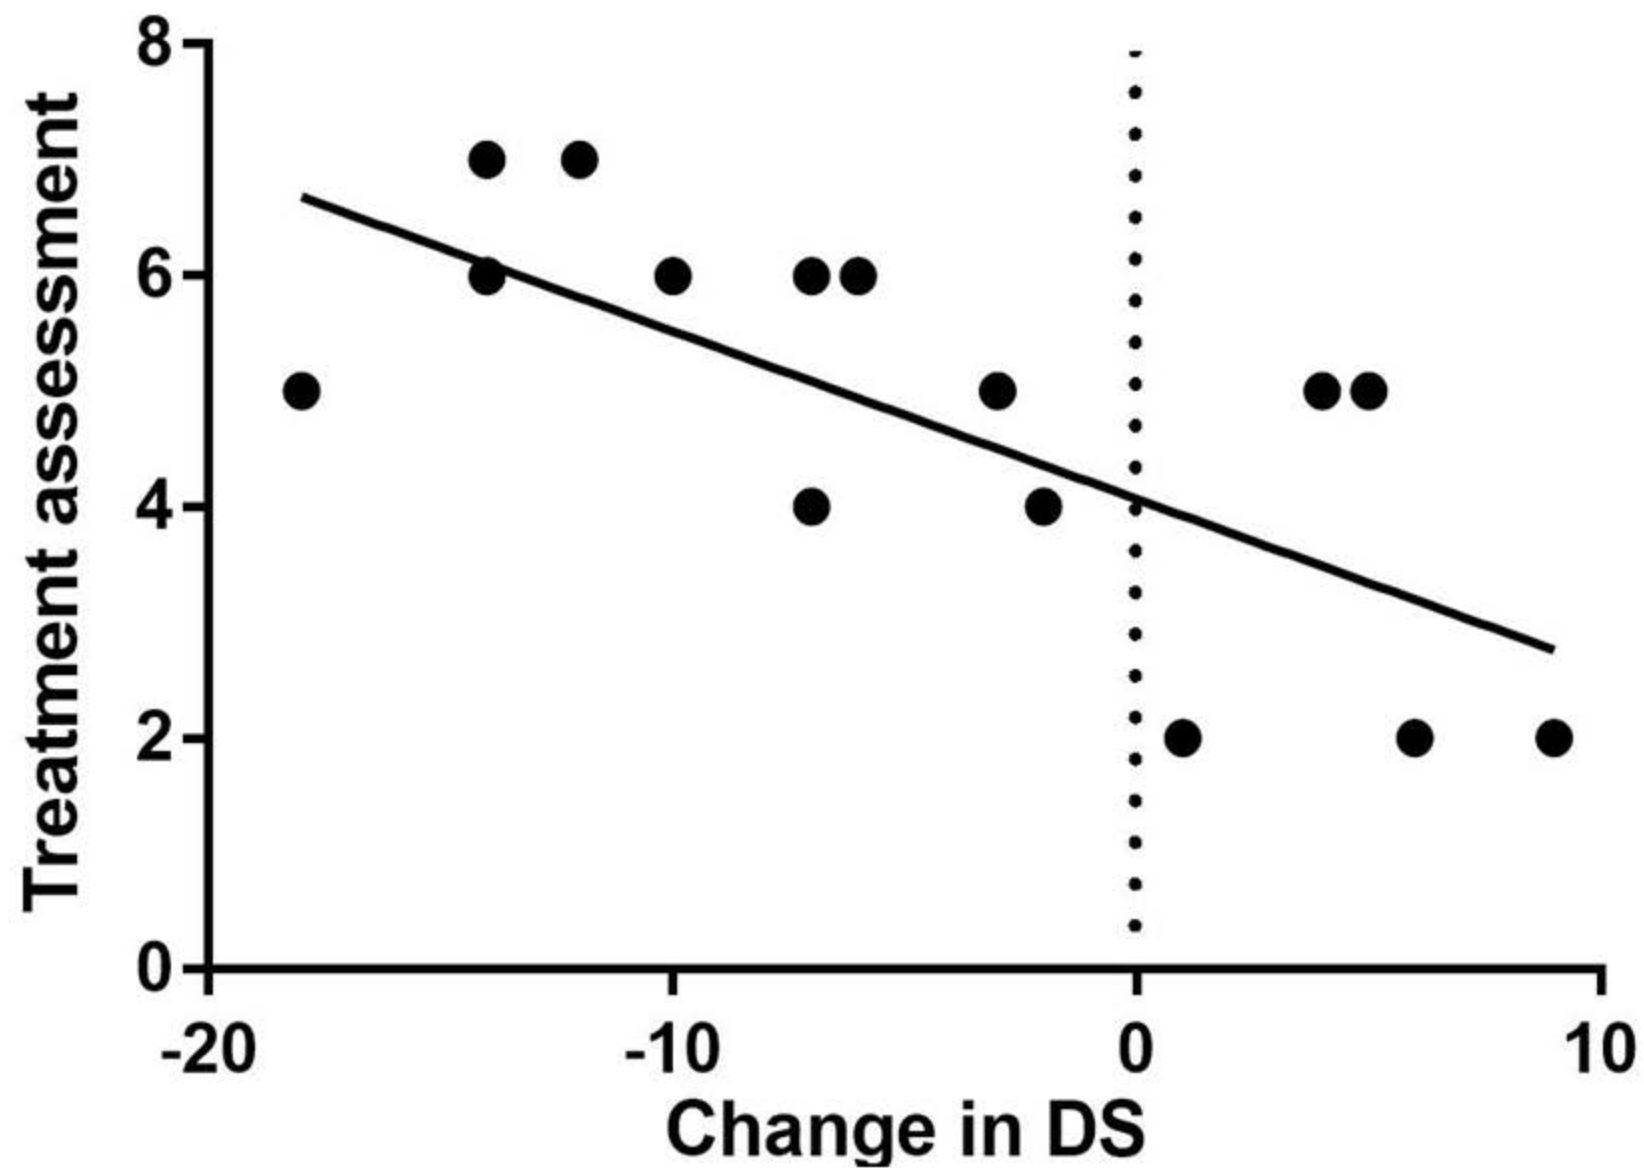

Supplement: Supplemental_material3.pdf [file Supplemental_material3.pdf]
